# Supplementary material for: A Small In Vitro Fermentation Model for Screening the Gut Microbiota Effects of Different Fiber Preparations
Source: PubMed Central journal article supplement (PMC6514940; doi:10.3390/ijms20081925), 2019-04-18
Supplement: ijms-20-01925-s001.pdf [file ijms-20-01925-s001.pdf]

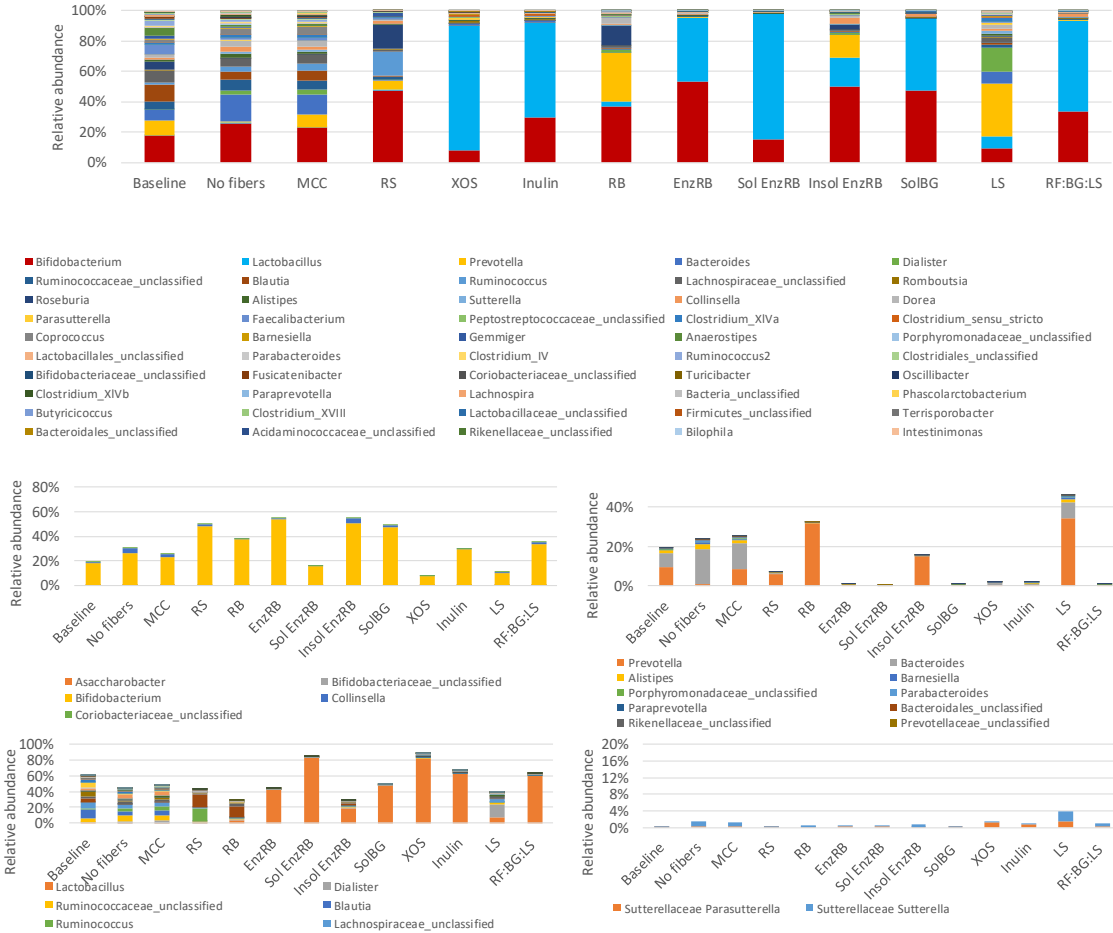

**Figure S1.** The composition of bacterial community (genus level) after 48-h fermentation: (A) the major 60 genera; (B-E) main genera within phyla Actinobacteria (B), Bacteroidetes (C), Firmicutes (D) and Proteobacteria (E). MCC - microcrystalline cellulose, RS - Resistant Starch, LS - linseed, RB - rye bran, EnzRB - enzymatically treated rye bran, Sol EnzRB - soluble fraction of enzymatically treated rye bran, Insol EnzRB - insoluble fraction of enzymatically treated rye bran, SolBG -soluble oat fiber preparation, RF:BG:LS - a mixture of rye fiber:soluble oat fiber preparation:linseed at the ratio of 40:40:20.

Table S1. The number of selected microbial groups after 48-h fermentation of the dietary fiber samples with and without omoxicillin-clavulanic acid as determined by qPCR. For clarity the samples (fermentation of the fibers without antibiotic) presented on Figure 2 are added to this table.

| Dietary fiber preparation | Bacterial number $\pm$ StDev |                 |                 |                |
|---------------------------|------------------------------|-----------------|-----------------|----------------|
|                           | LAC                          | BCoAT           | Bifido          | pH             |
| Baseline                  | 7.2 $\pm$ 0.5                | 8.6 $\pm$ 0.1   | 7.6 $\pm$ 0.81  | 6.8 $\pm$ 0.1  |
| No fibers                 | 7.5 $\pm$ 0.4                | 8.5 $\pm$ 0.4   | 9.0 $\pm$ 0.3   | 6.1 $\pm$ 0.1  |
| No fibers + Ab            | 7.5 $\pm$ 0.8                | 8.44 $\pm$ 0.4  | 9.3 $\pm$ 0.61  | 6.2 $\pm$ 0.13 |
| MCC                       | 7.5 $\pm$ 0.5                | 8.4 $\pm$ 0.6   | 8.8 $\pm$ 0.3   | 6.0 $\pm$ 0.2  |
| MCC +Ab                   | 7.4 $\pm$ 0.9                | 8.09 $\pm$ 0.7  | 9.2 $\pm$ 0.86  | 6.0 $\pm$ 0.1  |
| RS                        | 7.7 $\pm$ 0.4                | 9.9 $\pm$ 0.6   | 9.8 $\pm$ 0.2   | 4.7 $\pm$ 0.2  |
| RS +Ab                    | 7.4 $\pm$ 0.2                | 9.65 $\pm$ 0.4  | 9.5 $\pm$ 0.22  | 4.7 $\pm$ 0.1  |
| XOS                       | 8.5 $\pm$ 0.6                | 6.0 $\pm$ 0.6   | 8.5 $\pm$ 0.4   | 3.9 $\pm$ 0.1  |
| XOS+Ab                    | 8.5 $\pm$ 0.6                | 6.31 $\pm$ 1.2  | 9.09 $\pm$ 0.40 | 3.8 $\pm$ 0.2  |
| inulin                    | 9.5                          | 6.9             | 9.2             | 4              |
| inulin+Ab                 | 9.5                          | 6.37            | 9.36            | 4.1            |
| RB                        | 8.7 $\pm$ 0.5                | 9.3 $\pm$ 0.5   | 9.6 $\pm$ 0.3   | 4.9 $\pm$ 0.1  |
| RB+Ab                     | 7.9 $\pm$ 1.2                | 7.6 $\pm$ 1.1   | 9.0 $\pm$ 0.40  | 4.9 $\pm$ 0.2  |
| EnzRB                     | 8.9 $\pm$ 1.4                | 7.6 $\pm$ 0.9   | 9.2 $\pm$ 0.6   | 4.9 $\pm$ 0.7  |
| EnzRB +Ab                 | 7.6 $\pm$ 1.5                | 7.8 $\pm$ 1.1   | 9.8 $\pm$ 0.69  | 5.0 $\pm$ 0.7  |
| Sol EnzRB                 | 9.8 $\pm$ 0.4                | 6.5 $\pm$ 0.6   | 8.7 $\pm$ 0.5   | 4.0 $\pm$ 0.2  |
| Sol EnzRB +Ab             | 8.5 $\pm$ 0.8                | 6.2 $\pm$ 0.36  | 9.1 $\pm$ 0.6   | 4.0 $\pm$ 0.1  |
| Insol EnzRB               | 9.2 $\pm$ 0.5                | 8.3 $\pm$ 1.5   | 9.3 $\pm$ 0.4   | 4.5 $\pm$ 0.2  |
| Insol EnzRB+Ab            | 8.0 $\pm$ .19                | 8.3 $\pm$ 0.88  | 9.7 $\pm$ 0.5   | 4.8 $\pm$ 0.2  |
| SolBG                     | 9.5 $\pm$ 0.4                | 6.5 $\pm$ 0.1   | 9.1 $\pm$ 0.2   | 4.0 $\pm$ 0.1  |
| SolBG+Ab                  | 8.7 $\pm$ 0.6                | 6.4 $\pm$ 0.26  | 9.6 $\pm$ 0.6   | 4.3 $\pm$ 0.1  |
| LS                        | 8.3 $\pm$ 0.4                | 8.3 $\pm$ 0.5   | 8.4 $\pm$ 0.1   | 5.2 $\pm$ 0.1  |
| LS+Ab                     | 8.3 $\pm$ .19                | 8.28 $\pm$ 1.70 | 9.4 $\pm$ 0.7   | 5.3 $\pm$ 0.1  |
| RF:BG:LS                  | 9.7 $\pm$ 0.5                | 6.4 $\pm$ 0.3   | 9.3 $\pm$ 0.5   | 4.4 $\pm$ 0.2  |
| RF:BG:LS +Ab              | 8.5 $\pm$ 1.0                | 7.18 $\pm$      | 9.2 $\pm$ 0.27  | 4.4 $\pm$ 0.1  |

LAC - *Lactobacillus*-group; Bifido - *Bifidobacterium* spp.; BCoAT - butyryl-CoA:acetate CoA-transferase gene; MCC - microcrystalline cellulose, RS - resistant starch, LS - linseed, RB - rye bran, EnzRB - enzymatically treated rye bran, Sol EnzRB - soluble fraction of enzymatically treated rye bran, Insol EnzRB - insoluble fraction of enzymatically treated rye bran, SolBG -soluble oat fiber preparation, RF:BG:LS - a mixture of rye fiber:soluble oat fiber preparation:linseed at the ratio of 40:40:20.

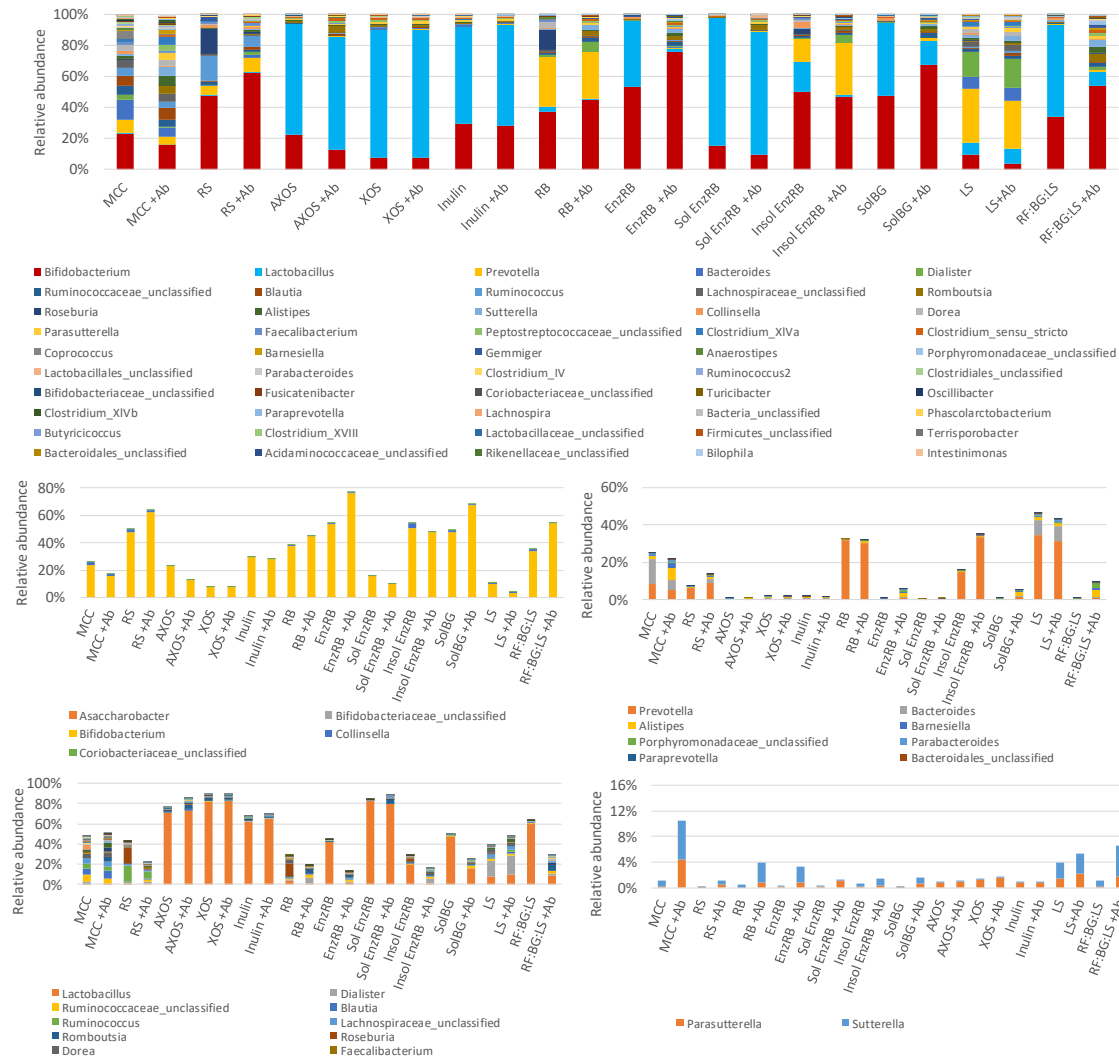

**Figure S2.** Changes in the bacterial community during the fermentation of the fibers without and with amoxicillin-clavulanate: (A) the major 60 genera; (B-E) main genera within phyla Actinobacteria (B), Bacteroidetes (C), Firmicutes (D) and Proteobacteria (E). For clarity the samples (fermentation of the fibers without amoxicillin-clavulanate) presented in Figure S2 are added to this figure. MCC - microcrystalline cellulose, RS - resistant starch, LS - linseed, RB - rye bran, EnzRB - enzymatically treated rye bran, Sol EnzRB - soluble fraction of enzymatically treated rye bran, Insol EnzRB - insoluble fraction of enzymatically treated rye bran, SolBG - soluble oat fiber preparation, RF:BG:LS - a mixture of rye fiber:soluble oat fiber preparation:linseed at the ratio of 40:40:20.
